# Supplementary material for: A small molecule produced by Lactobacillus species blocks Candida albicans filamentation by inhibiting a DYRK1-family kinase
Source: PubMed Central journal article supplement (PMC8536679; doi:10.1038/s41467-021-26390-w), 2021-10-22
Supplement: 41467_2021_26390_MOESM1_ESM.pdf [file 41467_2021_26390_MOESM1_ESM.pdf]

A Small Molecule Produced by *Lactobacillus* Species Blocks *Candida albicans*

Filamentation by Inhibiting a DYRK1-Family Kinase

## SUPPLEMENTARY FIGURES

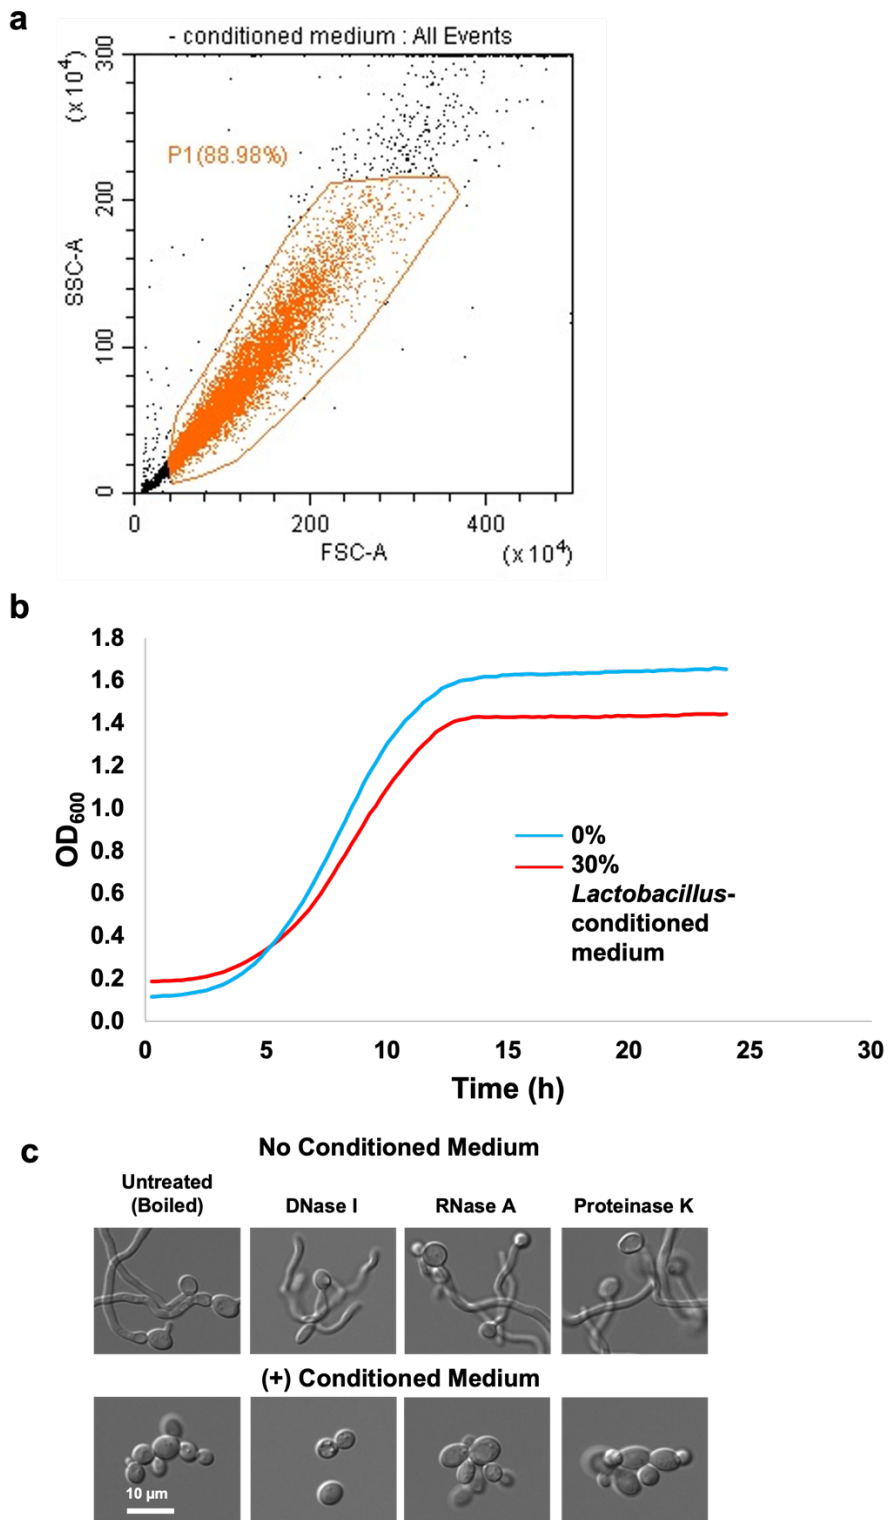

**Supplementary Fig. 1: Flow cytometry used to quantify *C. albicans* filamentation. a) Gating strategy used for flow cytometry experiments involving *pHWP1-GFP C. albicans*. b) Growth**

curve of wild-type *C. albicans* cultured in the presence of 0% or 30% v/v *Lactobacillus*-conditioned medium for 24 hours at 30°C under shaking conditions. Growth was assessed by measuring OD<sub>600</sub> every 15 minutes for 24 hours. Source data are provided as a Source Data file.

**c)** DNase I, RNase A, or Proteinase K treatment (100 mg/L, one hour at 37°C) did not impair the filamentation-repressing activity of *L. rhamnosus*-conditioned medium (30% v/v). After treatment, media were added to cultures of *C. albicans* and cells were imaged after incubation at 42°C for 6 hours. Data represents two biological replicates.

■ Blocked  
■ Not Blocked

Filamentation  
 Growth

|                                        |  |  |
|----------------------------------------|--|--|
| <i>Sphingomonas aurantiaca</i>         |  |  |
| <i>Escherichia coli</i>                |  |  |
| <i>Klebsiella pneumoniae</i>           |  |  |
| <i>Pasteurella pneumotropica</i>       |  |  |
| <i>Stenotrophomonas rhizophila</i>     |  |  |
| <i>Parabacteroides distasonis</i>      |  |  |
| <i>Barnesiella viscericola</i>         |  |  |
| <i>Prevotella loescheii</i>            |  |  |
| <i>Bacteroides rodentium</i>           |  |  |
| <i>Bacteroides sartorii</i>            |  |  |
| <i>Bacteroides xyloxydans</i>          |  |  |
| <i>Bacteroides faecichinchillae</i>    |  |  |
| <i>Bacteroides acidifaciens</i>        |  |  |
| <i>Adlercreutzia equolifaciens</i>     |  |  |
| <i>Enterorhabdus mucosicola</i>        |  |  |
| <i>Olsenella umbonate</i>              |  |  |
| <i>Olsenella profuse</i>               |  |  |
| <i>Bifidobacterium pseudolongum</i>    |  |  |
| <i>Microbacterium dextranolyticum</i>  |  |  |
| <i>Microbacterium hallimonae</i>       |  |  |
| <i>Propionibacterium acnes</i>         |  |  |
| <i>Propionibacterium humerisii</i>     |  |  |
| <i>Clostridium polysaccharolyticum</i> |  |  |
| <i>Ruminococcus gauvreauii</i>         |  |  |
| **Eisen. Tayi                          |  |  |
| <i>Clostridium perfringens</i>         |  |  |
| <i>Clostridium sartagoforme</i>        |  |  |
| <i>Faecalicoccus acidiformans</i>      |  |  |
| <i>Streptococcus danieliae</i>         |  |  |
| <i>Ligilactobacillus animalis</i>      |  |  |
| <i>Limosilactobacillus reuteri</i>     |  |  |
| <i>Lactobacillus intestinalis</i>      |  |  |
| <i>Lactobacillus gasseri</i>           |  |  |
| <i>Lactobacillus johnsonii</i>         |  |  |
| <i>Enterococcus faecalis</i>           |  |  |
| <i>Enterococcus hirae</i>              |  |  |
| <i>Enterococcus lactis</i>             |  |  |
| <i>Staphylococcus saprophyticus</i>    |  |  |
| <i>Staphylococcus xyloxydans</i>       |  |  |
| <i>Staphylococcus simulans</i>         |  |  |
| <i>Staphylococcus haemolyticus</i>     |  |  |
| <i>Staphylococcus epidermis</i>        |  |  |
| <i>Staphylococcus caprae</i>           |  |  |
| <i>Staphylococcus capitis</i>          |  |  |

Supplementary Fig. 2: Select *Lactobacillus* species and *Enterococcus faecalis* inhibit *C.*

***albicans* hyphal morphogenesis without affecting growth.** Conditioned-medium (30% v/v) from 44 bacterial isolates from the mouse gut and nine industrial *Lactobacillus* isolates were tested for their ability to block *C. albicans* filamentation in response to high temperature (42 °C, 6 hours). Growth was assessed qualitatively by light microscopy. Red indicates a block in filamentation or impaired growth. Blue represents filamentous growth and robust growth.

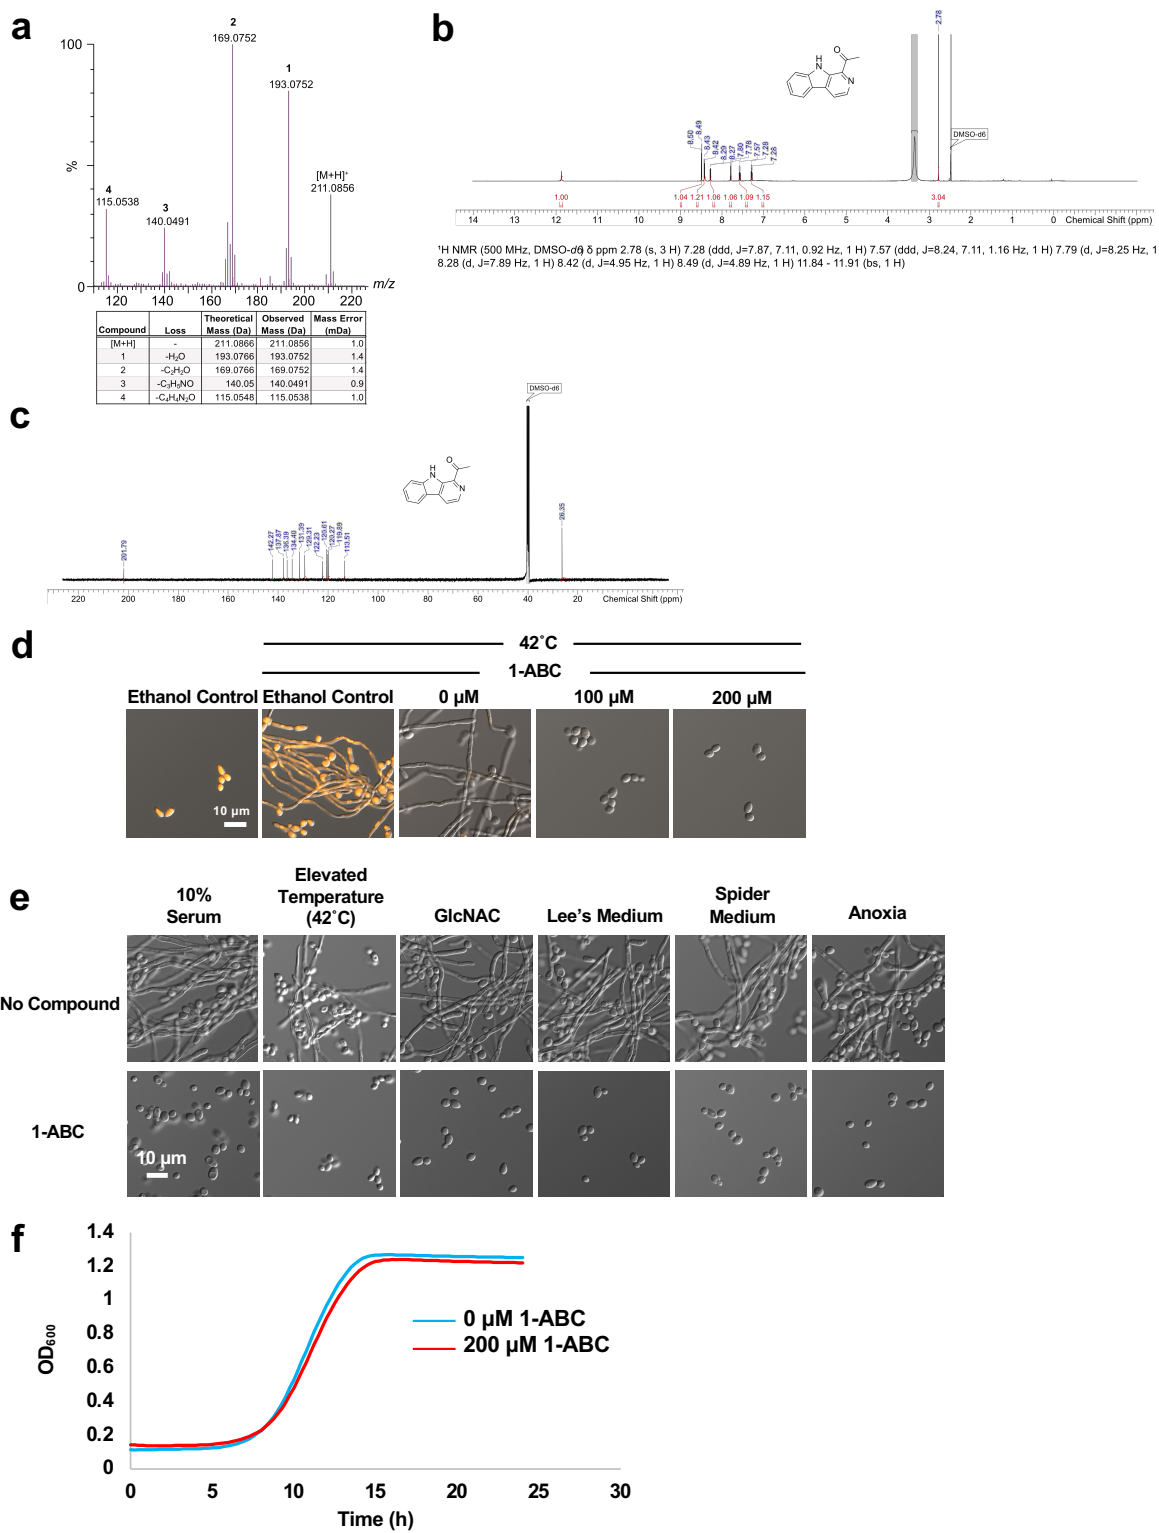

Supplementary Fig. 3: Identification of *Lactobacillus*-secreted 1-ABC. a) Tandem mass

spectrometry fingerprint of 1-ABC conforms to the elucidated structure of 1-ABC. b) <sup>1</sup>H NMR Spectrum for 1-ABC in d<sub>6</sub>-DMSO. c) <sup>13</sup>C NMR Spectrum for 1-ABC in d<sub>6</sub>-DMSO. d) 1-ABC treatment did not affect *C. albicans* viability, as indicated by propidium iodide staining. Aliquots of cells were treated with 70% ethanol to serve as a positive control for cell death and fluorescence was visualized via microscopy. Data represent two biological replicates. e) 1-ABC blocks *C. albicans* filamentation in response to diverse inducing cues including elevated temperature (42 °C, 6 hours, YPD), 10% serum (37 °C, 3 hours, YPD), 5 mM N-acetylglucosamine (GlcNAc; 37 °C, 3 hours, YPD), Lee's Medium (37 °C, 6 hours), Spider Medium (37 °C, 6 hours), and growth under anaerobic conditions (37 °C, 4 hours, YPD). Data represent two biological replicates. f) Growth curve of wild-type *C. albicans* cultured in the presence of 0 μM or 200 μM 1-ABC for 24 hours at 30 °C under shaking conditions. Growth was assessed by measuring OD<sub>600</sub> every 15 minutes for 24 hours. Source data are provided as a Source Data file.

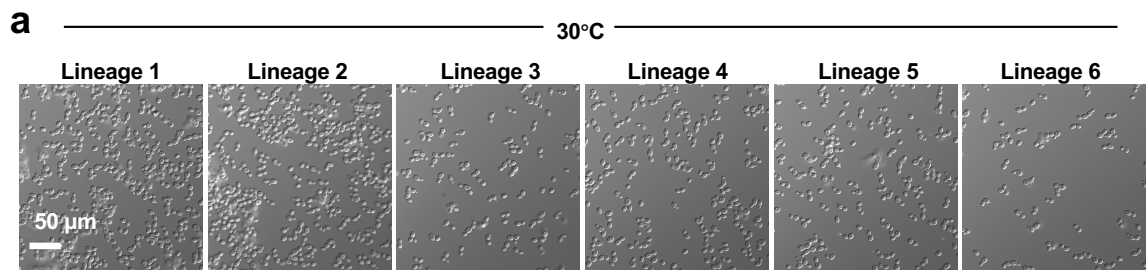

**b**

| Lineage | Gene              | Description                                                            | Substitution | Type of Mutation |
|---------|-------------------|------------------------------------------------------------------------|--------------|------------------|
| 3       | <i>ACP1</i>       | Mitochondrial acyl carrier protein involved in fatty acid biosynthesis | M19I         | LOH              |
| 4       | <i>orf19.1831</i> | Unknown function                                                       | T124A        | LOH              |
| 5       | <i>orf19.3728</i> | Predicted phosphatase binding and regulation                           | N222T        | LOH              |
| 6       | <i>YKU80</i>      | NHEJ double strand break repair                                        | L152I        | LOH              |

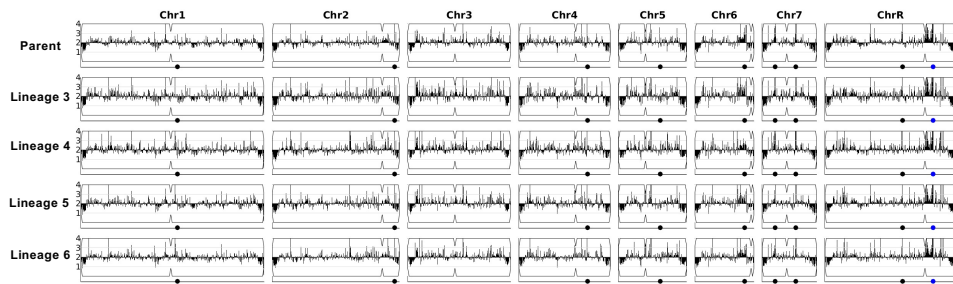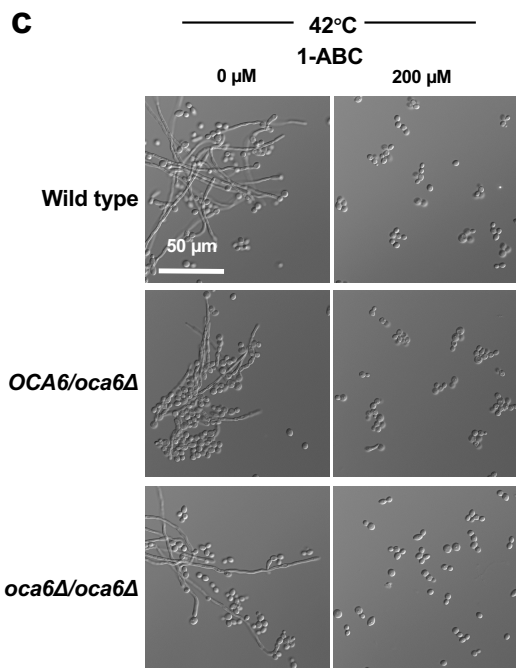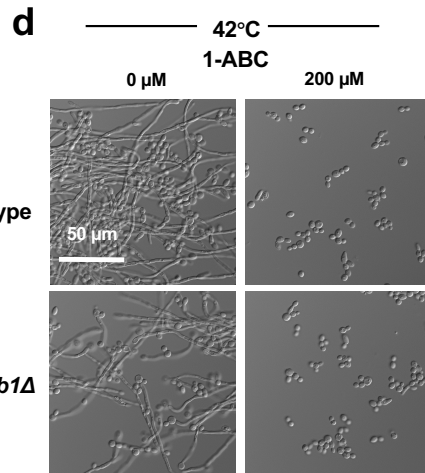

Supplementary Fig. 4: Selection-based strategy identifies six independent mutants with



**restored filamentation in the presence of 1-ABC.** a) The six lineages capable of filamenting in response to 1-ABC do not exhibit constitutive filamentation. Cultures were grown at 30°C for 18 hours. Data represents three biological replicates. b) Whole-genome sequencing analysis of all six mutant lineages did not detect any copy number variants in the mutants relative to the parental strain. Copy number variant analysis was conducted and visualized using the Y-MAP software<sup>1</sup>. Summary of whole-genome sequencing results for Lineages 3-6. All identified loss-of-heterozygosity events or single nucleotide polymorphisms that occurred within open reading frames are shown. Results were independently validated using Sanger sequencing. c) Deletion of *OCA6* does not affect the *C. albicans* response to 1-ABC. Filamentation was induced by growth at elevated temperature (42°C, 6 hours). Data represent three biological replicates. d) Heterozygous deletion of *ROB1* does not affect the *C. albicans* response to 1-ABC. Filamentation was induced by growth at elevated temperature (42°C, 6 hours). Data represent three biological replicates.

| <b>a</b> | Compound                                     | Structure                                                                          | Minimum Effective Concentration | Inactivation by HepG2 |
|----------|----------------------------------------------|------------------------------------------------------------------------------------|---------------------------------|-----------------------|
|          | 1-ABC                                        | 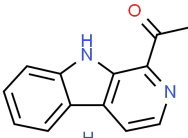  | 25 $\mu$ M                      | YES                   |
|          | Beta-carboline-3-carboxylic acid methylamide |   | 100 $\mu$ M                     | YES                   |
|          | 1-ECBC                                       |   | 50 $\mu$ M                      | NO                    |
|          | Harmane                                      |   | 200 $\mu$ M                     | YES                   |
|          | Norharmane                                   |   | >200 $\mu$ M                    | YES                   |
|          | Harmine                                      |  | 200 $\mu$ M                     | N/A                   |

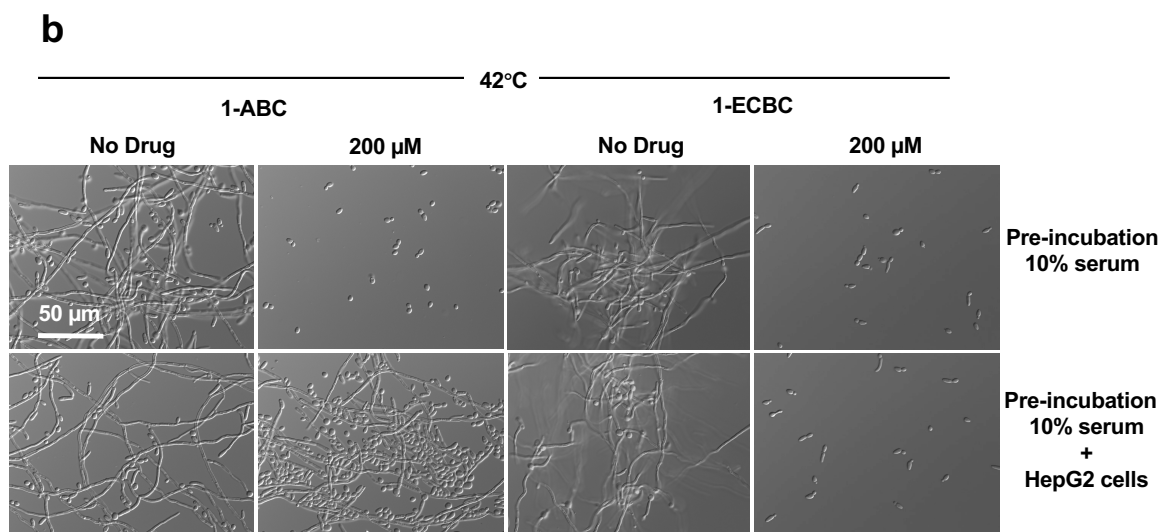

Supplementary Fig. 5: 1-ECBC inhibits *C. albicans* filamentation and is not inactivated by

**human cells.** a) Bioactivity and stability data for  $\beta$ -carboline as monitored by ability to block *C. albicans* filamentation induced by 5% serum at 37°C for six hours. b) 1-ABC was inactivated by human HepG2 cells following incubation with a monolayer of cells overnight, while the alternative  $\beta$ -carboline, 1-ECBC, retained activity. *C. albicans* filamentation was induced with 5% serum at 37°C for six hours. Light microscopy images were taken at 10X magnification. Data represent two biological replicates.

## SUPPLEMENTARY TABLES

**Supplementary Table 1: Strains used in this study.**

| Accession Number | Strain Name                          | Genotype                                                                                                                         | Source |
|------------------|--------------------------------------|----------------------------------------------------------------------------------------------------------------------------------|--------|
| CaLC239          | SN95                                 | <i>arg4Δ/arg4Δ his1Δ/his1Δ</i><br><i>URA3/ura3::imm434 IRO1/iro1::imm434</i>                                                     | 2      |
| CaLC715          | <i>HWP1p-</i><br><i>GFP/HWP1</i>     |                                                                                                                                  | 3      |
| CaLC1724         | GRACE-1198                           | <i>ura3::imm434/ura3::imm434</i><br><i>his3::HISG/his::HISGtetR-</i><br><i>GAL4AD::URA3 yak1::HIS3 SAT1-tetp-</i><br><i>YAK1</i> | 4      |
| CaLC3365         | CaSS1                                | <i>ura3::imm434/ura3::imm434</i><br><i>his3::HISG/his::HISGtetR-</i><br><i>GAL4AD::URA3</i>                                      | 4      |
| CaLC3900         | <i>HWP1p-NAT-</i><br><i>HIS/HWP1</i> | <i>arg4Δ/arg4Δ his1Δ/his1Δ</i><br><i>URA3/ura3::imm434 IRO1/iro1::imm434</i><br><i>HWP1p-NAT-HIS/HWP1</i>                        | 5      |

|          |                                            |                                                                                                        |                                 |
|----------|--------------------------------------------|--------------------------------------------------------------------------------------------------------|---------------------------------|
| LrLC4744 | <i>Lacticaseibacillus rhamnosus</i> R0011  | Wild type                                                                                              | Lallemand Health Solutions Inc. |
| LhLC4745 | <i>Lactobacillus helveticus</i> R0052      | Wild type                                                                                              | Lallemand Health Solutions Inc. |
| LcLC4746 | <i>Lacticaseibacillus casei</i> HA108      | Wild type                                                                                              | Lallemand Health Solutions Inc. |
| LrLC4747 | <i>Lacticaseibacillus rhamnosus</i> HA111  | Wild type                                                                                              | Lallemand Health Solutions Inc. |
| LrLC4748 | <i>Lacticaseibacillus rhamnosus</i> HA114  | Wild type                                                                                              | Lallemand Health Solutions Inc. |
| LbLC4749 | <i>Levilactobacillus brevis</i> HA112      | Wild type                                                                                              | Lallemand Health Solutions Inc. |
| LrLC4750 | <i>Limosilactobacillus reuteri</i> HA118   | Wild type                                                                                              | Lallemand Health Solutions Inc. |
| LpLC4751 | <i>Lactiplantibacillus plantarum</i> HA119 | Wild type                                                                                              | Lallemand Health Solutions Inc. |
| CaLC7195 | Evolved Lineage 1                          | <i>arg4Δ/arg4Δ his1Δ/his1Δ URA3/ura3::imm434 IRO1/iro1::imm434 HWP1p-NAT-HIS/HWP1 OCA6I43/OCA6 I43</i> | This Study                      |

|          |                                                          |                                                                                                                                 |            |
|----------|----------------------------------------------------------|---------------------------------------------------------------------------------------------------------------------------------|------------|
|          |                                                          |                                                                                                                                 |            |
| CaLC7196 | Evolved Lineage<br>2                                     | <i>arg4Δ/arg4Δ his1Δ/his1Δ<br/>URA3/ura3::imm434 IRO1/iro1::imm434<br/>HWP1p-NAT-HIS/HWP1<br/>ROB1L672V/ROB1</i>                | This Study |
| CaLC7197 | Evolved Lineage<br>3                                     | <i>arg4Δ/arg4Δ his1Δ/his1Δ<br/>URA3/ura3::imm434 IRO1/iro1::imm434<br/>HWP1p-NAT-HIS/HWP1<br/>ROB1L672V/ROB1</i>                | This Study |
| CaLC7198 | Evolved Lineage<br>4                                     | <i>arg4Δ/arg4Δ his1Δ/his1Δ<br/>URA3/ura3::imm434 IRO1/iro1::imm434<br/>HWP1p-NAT-HIS/HWP1<br/>orf19.1831A124/orf19.1831A124</i> | This Study |
| CaLC7199 | Evolved Lineage<br>5                                     | <i>arg4Δ/arg4Δ his1Δ/his1Δ<br/>URA3/ura3::imm434 IRO1/iro1::imm434<br/>HWP1p-NAT-HIS/HWP1<br/>orf19.3728T222/orf19.3728T222</i> | This Study |
| CaLC7200 | Evolved Lineage<br>6                                     | <i>arg4Δ/arg4Δ his1Δ/his1Δ<br/>URA3/ura3::imm434 IRO1/iro1::imm434<br/>HWP1p-NAT-HIS/HWP1<br/>YKU80I152/YKU80I152</i>           | This Study |
| CaLC7201 | As CaLC7195,<br>Oca6 <sup>N43</sup> /Oca6 <sup>I43</sup> | <i>his1Δ/his1Δ URA3/ura3::imm434<br/>IRO1/iro1::imm434 HWP1p-NAT-<br/>HIS/HWP1 OCA6N43::ARG/OCA6 I43</i>                        | This Study |
| CaLC7202 | As CaLC3900,<br>Oca6 <sup>I43</sup> /Oca6 <sup>I43</sup> | <i>his1Δ/his1Δ URA3/ura3::imm434<br/>IRO1/iro1::imm434 HWP1p-NAT-<br/>HIS/HWP1<br/>OCA6I43::ARG/OCA6I43::ARG</i>                | This Study |

|          |                                                                          |                                                                                                                                            |            |
|----------|--------------------------------------------------------------------------|--------------------------------------------------------------------------------------------------------------------------------------------|------------|
| CaLC7203 | As CaLC7196,<br><i>ROB1/ROB1</i>                                         | <i>his1Δ/his1Δ URA3/ura3::imm434 IRO1/iro1::imm434 HWP1p-NAT-HIS/HWP1 ROB1::ARG/ROB1</i>                                                   | This Study |
| CaLC7285 | As CaLC3900,<br><i>ROB1/ROB1<sup>L672V</sup></i>                         | <i>his1Δ/his1Δ URA3/ura3::imm434 IRO1/iro1::imm434 HWP1p-NAT-HIS/HWP1 ROB1/ROB1<sup>L672V</sup>::ARG</i>                                   | This Study |
| CaLC7286 | As CaLC7195,<br><i>yak1Δ/yak1Δ</i>                                       | <i>his1Δ/his1Δ URA3/ura3::imm434 IRO1/iro1::imm434 HWP1p-NAT-HIS/HWP1 OCA6I43/OCA6I43 yak1::ARG/yak1::ARG</i>                              | This Study |
| CaLC7287 | As CaLC7196,<br><i>yak1Δ/yak1Δ</i>                                       | <i>his1Δ/his1Δ URA3/ura3::imm434 IRO1/iro1::imm434 HWP1p-NAT-HIS/HWP1 ROB1/ROB1<sup>L672V</sup> yak1::ARG/yak1::ARG</i>                    | This Study |
| CaLC7453 | As CaLC3365,<br>tetO- <i>YAK1-HIS3-FLAG/</i> tetO- <i>YAK1-HIS3-FLAG</i> | <i>ura3::imm434/ura3::imm434 his3::HISG/his::HISGtetR-GAL4AD::URA3 HygB-TAR-tetO-YAK1-6his3Flag-SAT1/HygB-TAR-tetO-YAK1-6his3Flag-SAT1</i> | This Study |

**Supplementary Table 2: Plasmids used in this study.**

| Plasmid | Description          | Source       |
|---------|----------------------|--------------|
| pLC1031 | <i>HygB-TAR-tetO</i> | <sup>6</sup> |
| pLC1081 | pV1093               | <sup>7</sup> |
| pLC1100 | pFA-3HA-ARG          | <sup>8</sup> |

**Supplementary Table 3: Oligonucleotides used in this study.**

| Accession Number | Name                                   | Sequence (5'-3')                                                                                       |
|------------------|----------------------------------------|--------------------------------------------------------------------------------------------------------|
| oLC2637          | CaROB1AB<br>+1346F                     | TGCTGCTTTGATAGCTTCTGG                                                                                  |
| oLC2888          | CaROB1-372F                            | CCTCATGAATACTCAGCTGAG                                                                                  |
| oLC4714          | tetOp+488F                             | TCGTTTCTGATGGGCTTTTC                                                                                   |
| oLC5570          | CdARG4+1309-F                          | AGTGTGGAAAGAAGAGATGC                                                                                   |
| oLC6393          | CaYAK1AB-91-F                          | AACGCAAGAGATCACATACC                                                                                   |
| oLC6926          | SNR52/F                                | AAGAAAGAAAGAAAACCAGGAGTGAA                                                                             |
| oLC6927          | sgRNA/R                                | ACAAATATTTAAACTCGGGACCTGG                                                                              |
| oLC6928          | SNR52/N                                | GCGGCCGCAAGTGATTAGACT                                                                                  |
| oLC6929          | sgRNA/N                                | GCAGCTCAGTGATTAAGAGTAAAGATGG                                                                           |
| oLC8303          | ROB1+2391R                             | CATCCCTTCTTCTTTGTTCC                                                                                   |
| oLC8730          | CaOCA6 -3 F                            | ACAATGTCACAAATTGTCCC                                                                                   |
| oLC8740          | CaOCA6 -262 F                          | TAGTTGTTGGTGTGCCTACC                                                                                   |
| oLC8741          | CaOCA6 +475 R                          | TGTATTTGCGCCGTGGAATCC                                                                                  |
| oLC8759          | CaROB1 + 3521 R                        | CTCAAAGTGGGTGCTATAGG                                                                                   |
| oLC8906          | ROB1 + 3353 +<br>ARG4 up<br>homology R | TCGATACATTTGCGGTACAGAAATGTTCTT<br>AATCTTCGGGTTTGAGTACC                                                 |
| oLC8907          | ARG4 -1033 +<br>ROB1 ds<br>homology F  | CGGGTACTCAAACCCGAAGATTAAGAACA<br>TTTCTGTACCGCA                                                         |
| oLC8908          | ARG4 + 3211 +<br>ROB1 ds<br>homology R | ACTACTACTACTACACTCTAACACGGATA<br>AATACACCCTTTAGTCGGTGGTGGAAATG<br>CACGTTTGATTTACAAAAGCTATTTGCATC<br>GT |
| oLC8916          | OCA6 + 917 +<br>ARG4 up<br>homology R  | TCGATACATTTGCGGTACAGAAATGTTCTT<br>AAGAATTGGACATGACTCCG                                                 |
| oLC8917          | ARG4 -1033 +<br>OCA6 ds<br>homology F  | CCGGCCAATACGGAGTCATGTCCAATTCTT<br>AAGAACATTTCTGTACCGCA                                                 |

|         |                                        |                                                                                                                  |
|---------|----------------------------------------|------------------------------------------------------------------------------------------------------------------|
| oLC8918 | ARG4 + 3211 +<br>OCA6 ds<br>homology R | AAGCGGTTCAAATGACCGCCAGTGGTGG<br>ATTTCACAAATTGGAACTTTTGTGACTTA<br>CCCTGTGAATGACAAAAGCTATTTGCATC<br>GT             |
| oLC9199 | oLC9199_SNR52/<br>R Yak1tag            | CCACATTGTTATTCTTATTCCAAATTA<br>ATAAGTTTACGCAAGTC                                                                 |
| oLC9200 | oLC9200_SNR52/<br>R Yak1tag            | GAATAAGAATAACAATGTGGGTTTTAGAG<br>CTAGAAATAGCAAGTTAAA                                                             |
| oLC9201 | oLC9201_Yak1 del<br>F                  | TCACATACCATTAATAATATATAAGACCA<br>ACCATTGTAACCACACAAAGTATCACAGT<br>ATCACCGACAAATTTATACATAATGGCGG<br>TCGACGGATCCCC |
| oLC9203 | oLC9203_Yak1<br>del/tag R              | AAACAAGATTGTTACATAAAACAAAATTA<br>TAAAAAGTATCATTAAAGAGTATAAAAC<br>TTAATACTGGTCAACCTCCCCCTCTCGATG<br>AATTCGAGCTCG  |
| oLC9204 | oLC9204_Yak1 orf<br>check F            | CAAATTCCTGGATTCCGTAACCCTTGG                                                                                      |
| oLC9205 | oLC9205_Yak1 orf<br>check R            | GCAATTCCAGCAGGACCAGAAGG                                                                                          |
| oLC9206 | oLC9206_Yak1 tag<br>check F            | CAATGATTGAAAAAGAATATCATGATCGA                                                                                    |
| oLC9207 | oLC9207_Yak1 tag<br>check R            | TATAAACCATATTCAGTTCTTAACAA                                                                                       |
| oLC9452 | CaYAK1_gRNA F                          | GATACTTTGTGTGGTTACAAGTTTTAGAGC<br>TAGAAATAGCAAGTTAAA                                                             |
| oLC9453 | CaYAK1_gRNA R                          | TTGTAACCACACAAAGTATCCAAATTA<br>AATAGTTTACGCAAGTC                                                                 |
| oLC9512 | oLC9512_1031_tet<br>O-Yak1 F           | AATTCTGATCCTCCCCCTTTTCCCTCAAG<br>TTCAAACAAAACGCAAGAGATCACATACC<br>ATTAATAATATATAAGACCAAGACGTCGT<br>ATAGTGCTTGCT  |
| oLC9513 | oLC9513_1031_tet<br>O-Yak1 R           | TGCCAATTCCTCCTATAGAATTGTGTCGA<br>TTAAAATTATAATTATAATTAGAACTGTTG<br>TTATTGTTATTATATGCCATCGACTATTA<br>TATTTGTATG   |



## SUPPLEMENTARY REFERENCES

1. Abbey, D. A. *et al.* YMAP: A pipeline for visualization of copy number variation and loss of heterozygosity in eukaryotic pathogens. *Genome Med.* **6**, 1–15 (2014).
2. Noble, S. M. & Johnson, A. D. Strains and strategies for large-scale gene deletion studies of the diploid human fungal pathogen *Candida albicans*. *Eukaryot. Cell* **4**, 298–309 (2005).
3. Staab, J. F., Bahn, Y. S. & Sundstrom, P. Integrative, multifunctional plasmids for hypha-specific or constitutive expression of green fluorescent protein in *Candida albicans*. *Microbiology* **149**, 2977–2986 (2003).
4. Roemer, T. *et al.* Large-scale essential gene identification in *Candida albicans* and applications to antifungal drug discovery. *Mol. Microbiol.* **50**, 167–181 (2003).
5. Polvi, E. J. *et al.* Functional divergence of a global regulatory complex governing fungal filamentation. *PLOS Genet.* **15**, e1007901 (2019).
6. Kim, S. H. *et al.* Genetic analysis of *Candida auris* implicates Hsp90 in morphogenesis and azole tolerance and Cdr1 in azole resistance. *mBio* **10**, e02529-18 (2019).
7. Vyas, V. K., Barrasa, M. I. & Fink, G. R. A *Candida albicans* CRISPR system permits genetic engineering of essential genes and gene families. *Sci. Adv.* **1**, e1500248 (2015).
8. Zhang, A. *et al.* The Tlo proteins are stoichiometric components of *Candida albicans* mediator anchored via the Med3 subunit. *Eukaryot. Cell* **11**, 874–884 (2012).
